# Supplementary material for: Why HS− and CN− can be detected by different chemosensors with similar structures: a quantum mechanics and molecular dynamics study
Source: Royal Society of Chemistry journal article supplement (doi:10.1039/c6ra12684g), 2016-01-01
Supplement: c6ra12684g1.pdf [file c6ra12684g1.pdf]

Supporting Information for: Why HS- and CN- can be detected by  
different chemosensors with similar structures:  
a quantum mechanics and molecular dynamics study

Chui-peng Kong<sup>a, b</sup>, Ran Jia<sup>\*, a</sup>, Yu-guang Zhao<sup>c</sup>, Jian Wang<sup>a</sup>, Ze-xing Qu<sup>a</sup>, and, Hong-xing Zhang<sup>\*, a</sup>

*a: Institute of Theoretical Chemistry, Jilin University, Changchun 130023, China*

*b: State Key Laboratory of Superhard Materials, College of Physics, Jilin University, Changchun 130012 China*

*c: Cancer Center, The First Hospital of Jilin University, Jilin University, Changchun 130023, China*

*Corresponding author: jiaran@jlu.edu.cn, zhanghx@jlu.edu.cn*

Table S1. The calculated main excitations of COUMC compared to other functionals and the experimental result.

| <b>Methods</b>    | <b>Excitation (nm)</b> |
|-------------------|------------------------|
| Wb97xd            | 493                    |
| PBE               | 522                    |
| M062X             | 498                    |
| LC-BLYP           | 452                    |
| B3LYP             | 533                    |
| BLYP              | 586                    |
| Exp. <sup>1</sup> | 588                    |

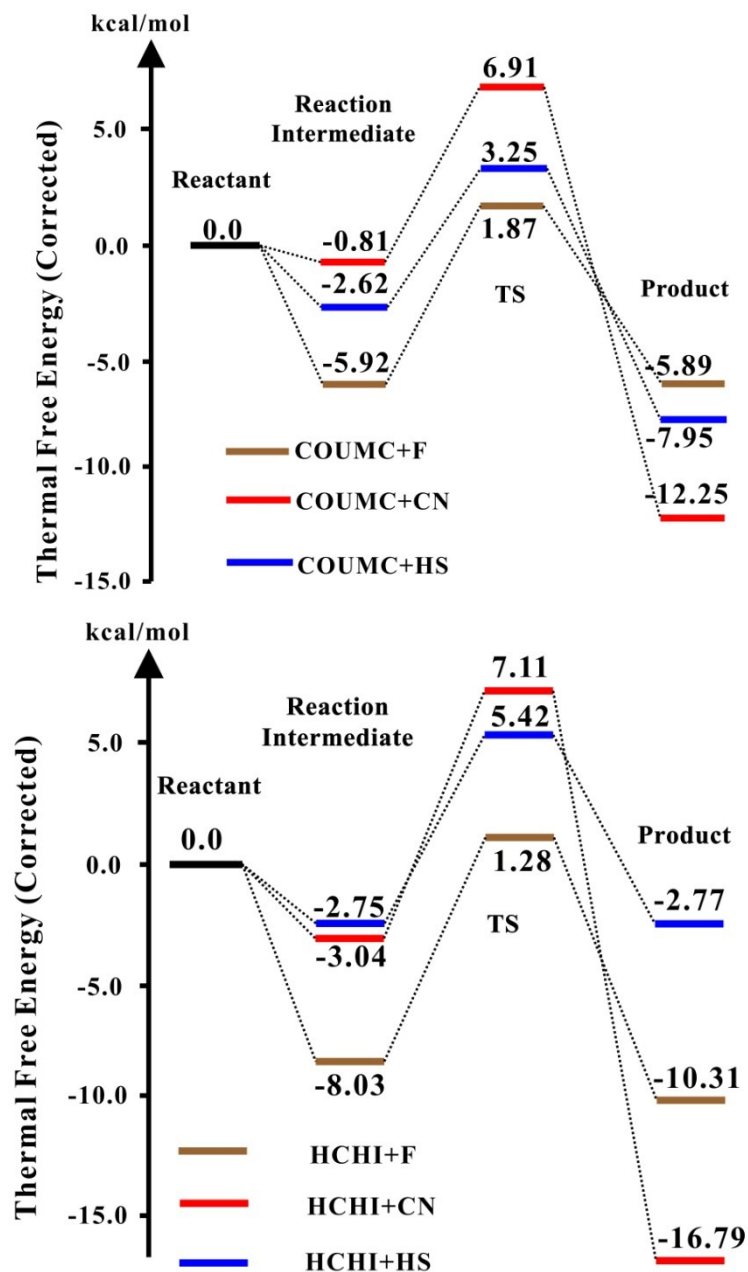

Figure S1 DFT-calculated free energy diagrams for COUMC (upper)/ HCHI (bottom) reacting with anions at 298.15K. Values of imaginary frequency are -113.9 (COUMC+F), -245.8 (COUMC+CN), -171.9 (COUMC+HS), -122.6 (HCHI+F), -276.6 (HCHI+CN), and -189.0 (HCHI+HS).

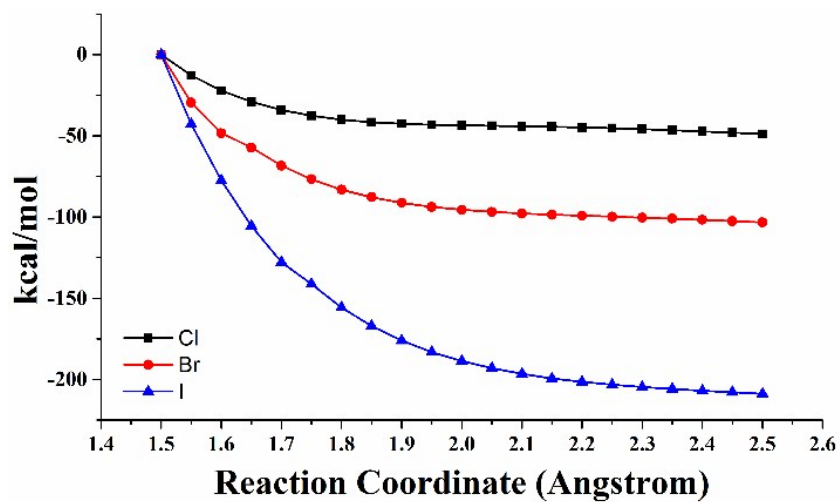

Figure S2 Flexible scanning the potential energy changes along reaction distances (X-C18) in COUMC system. Where X represents halogen anions (Cl<sup>-</sup>, Br<sup>-</sup>, and I<sup>-</sup>). This result indicates that COUMC is not intend to bind other halogen anions.

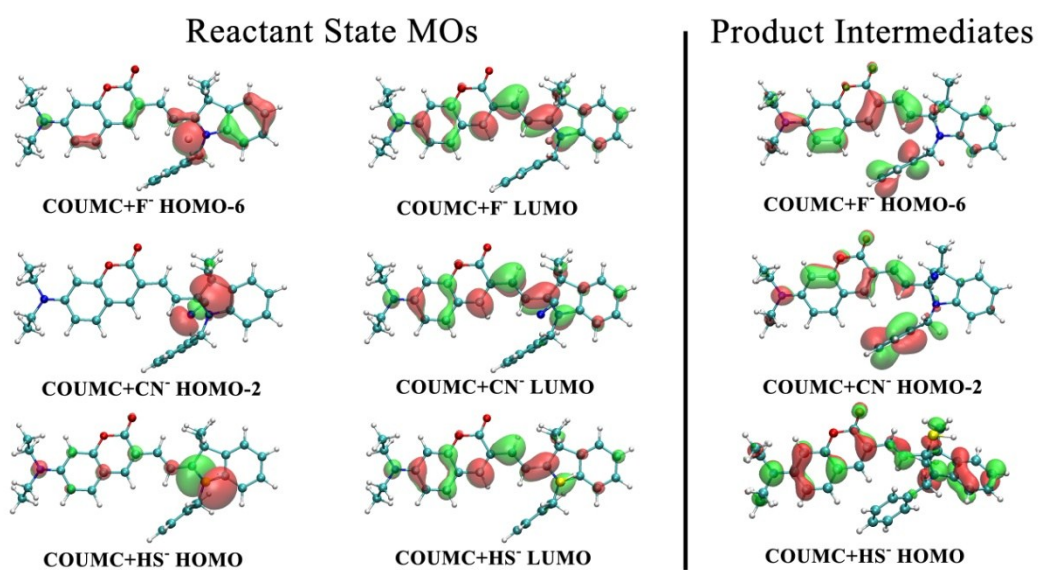

Figure S3 Geometries and Involved MOs for COUMC reacting with anions F<sup>-</sup>, CN<sup>-</sup>, and HS<sup>-</sup>.

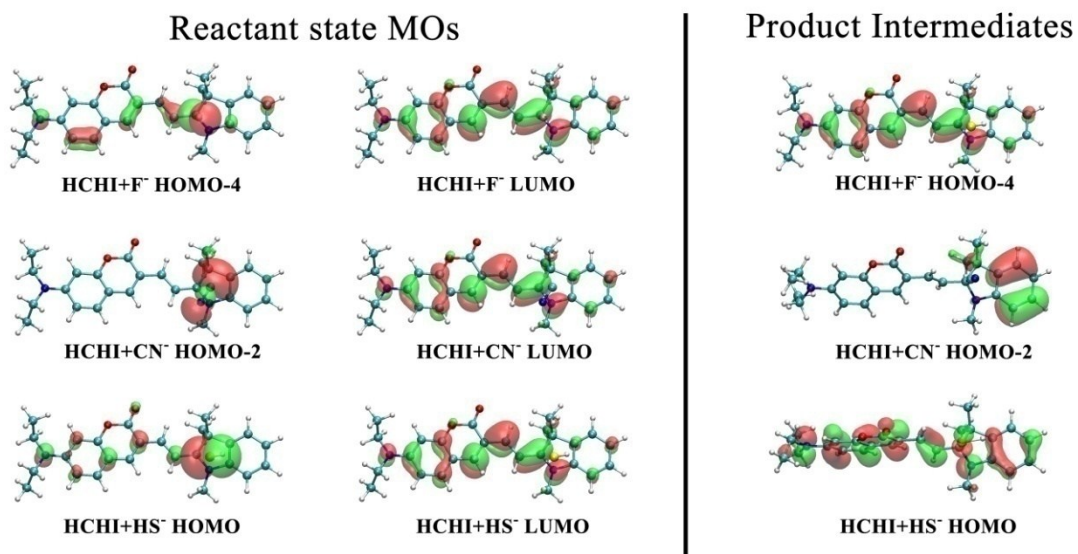

Figure S4 Geometries and involved MOs for HCHI reacting with anions F<sup>-</sup>, CN<sup>-</sup>, and HS<sup>-</sup>.

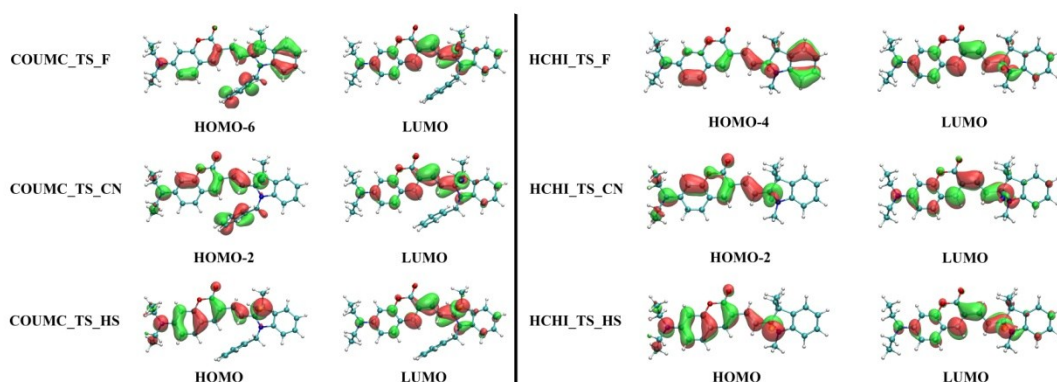

Figure S5 Geometries and involved MOs of TS states for COUMC/HCHI reacting with anions F<sup>-</sup>, CN<sup>-</sup>, and HS<sup>-</sup>.

Table S2 Reaction involved MOs in terms of a percentage contribution from each part for a single COUMC/HCHI and the corresponding reaction intermediates and product intermediates.

| System                      | MO     |     | Anion | BP   | SP   | SB   |
|-----------------------------|--------|-----|-------|------|------|------|
| <b>COUMC</b>                | HOMO   |     | /     | 87.4 | 12.0 | 0.6  |
|                             | LUMO   |     | /     | 66.3 | 32.7 | 1.0  |
| <b>COUMC+HS<sup>-</sup></b> | HOMO   | REA | 81.8  | 20.8 | -2.6 | 0.0  |
|                             |        | PRO | 0.9   | 91.4 | 7.3  | 0.4  |
| <b>COUMC+CN<sup>-</sup></b> | HOMO-2 | REA | 95.0  | 0.5  | 3.9  | 0.6  |
|                             |        | PRO | 0.0   | 45.4 | 3.4  | 51.2 |
| <b>COUMC+F<sup>-</sup></b>  | HOMO-6 | REA | 60.1  | 16.1 | 19.4 | 4.4  |
|                             |        | PRO | 0.6   | 62.3 | 6.9  | 30.2 |
| <b>HCHI</b>                 | HOMO   |     | /     | 87.8 | 12.2 | 0.0  |
|                             | LUMO   |     | /     | 66.8 | 33.2 | 0.0  |
| <b>HCHI+HS<sup>-</sup></b>  | HOMO   | REA | 88.6  | 10.1 | 10.3 | 0.0  |
|                             |        | PRO | 4.4   | 71.6 | 22.7 | 1.3  |
| <b>HCHI+CN<sup>-</sup></b>  | HOMO-2 | REA | 94.4  | 1.6  | 3.6  | 0.4  |
|                             |        | PRO | 1.0   | 92.7 | 6.1  | 0.3  |
| <b>HCHI+F<sup>-</sup></b>   | HOMO-4 | REA | 69.4  | 22.4 | 8.2  | 0.0  |
|                             |        | PRO | 0.1   | 96.1 | 3.3  | 0.5  |

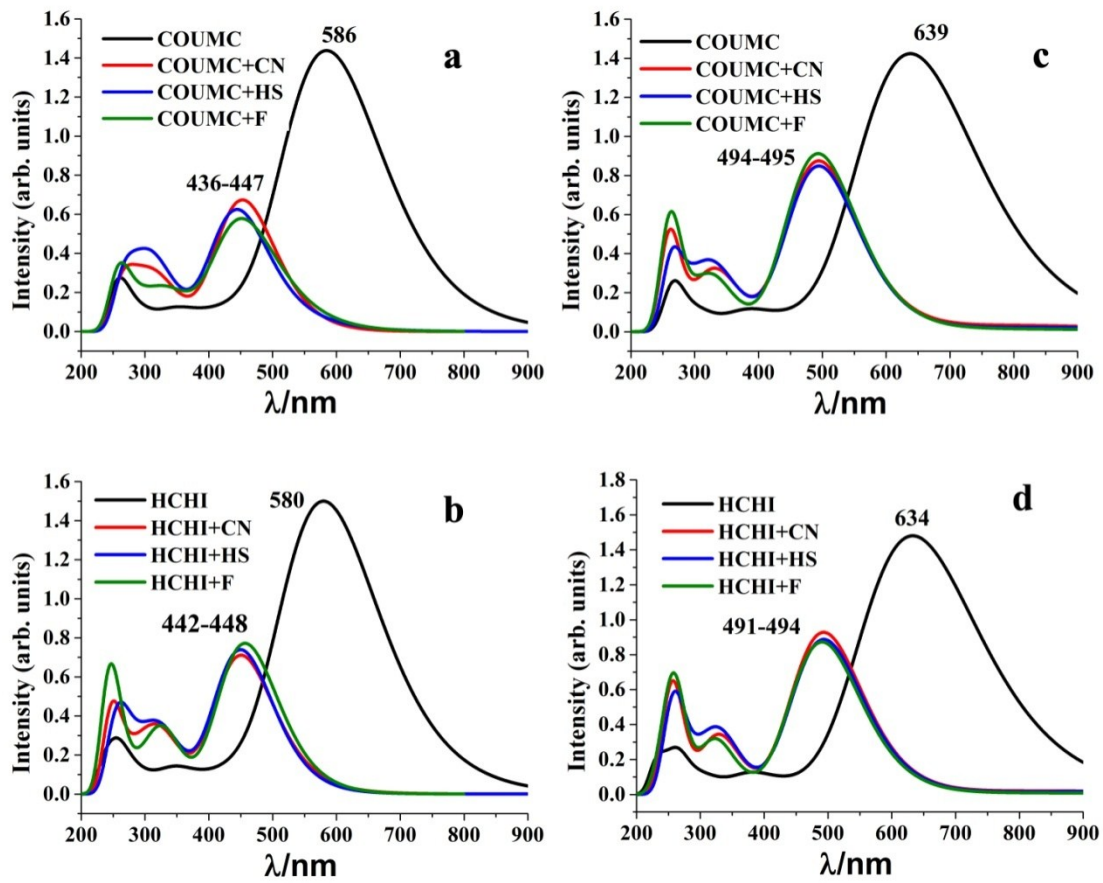

Figure S6 The computed absorption spectra for COUMC (a) and HCHI (b). The computed emission spectra for COUMC (c) and HCHI (d).

## Excitation

COUMC

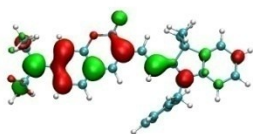

586 nm  
HOMO to LUMO

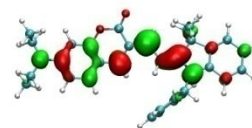

COUMC\_HS

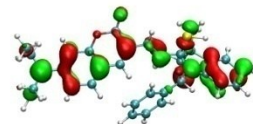

436 nm

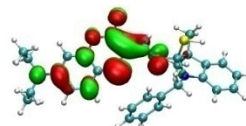

HOMO\_1 & HOMO to LUMO

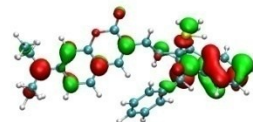

COUMC\_CN

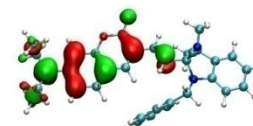

447 nm  
HOMO to LUMO

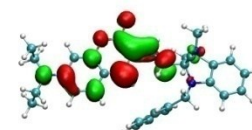

COUMC\_F

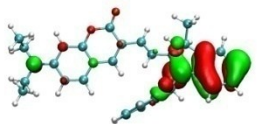

439 nm

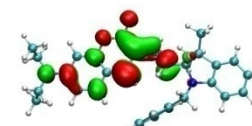

HOMO\_1 & HOMO to LUMO

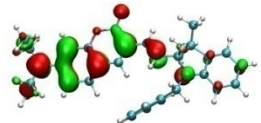

---

## Excitation

HCHI

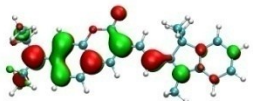

580 nm  
HOMO to LUMO

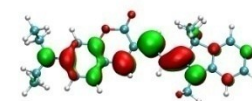

HCHI\_HS

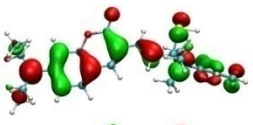

443 nm

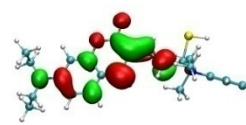

HOMO\_1 & HOMO to LUMO

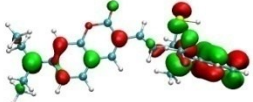

HCHI\_CN

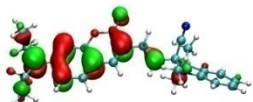

442 nm  
HOMO to LUMO

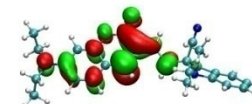

HCHI\_F

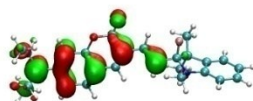

448 nm  
HOMO to LUMO

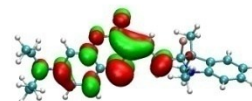

Figure S7 List of excitations.

## Emission

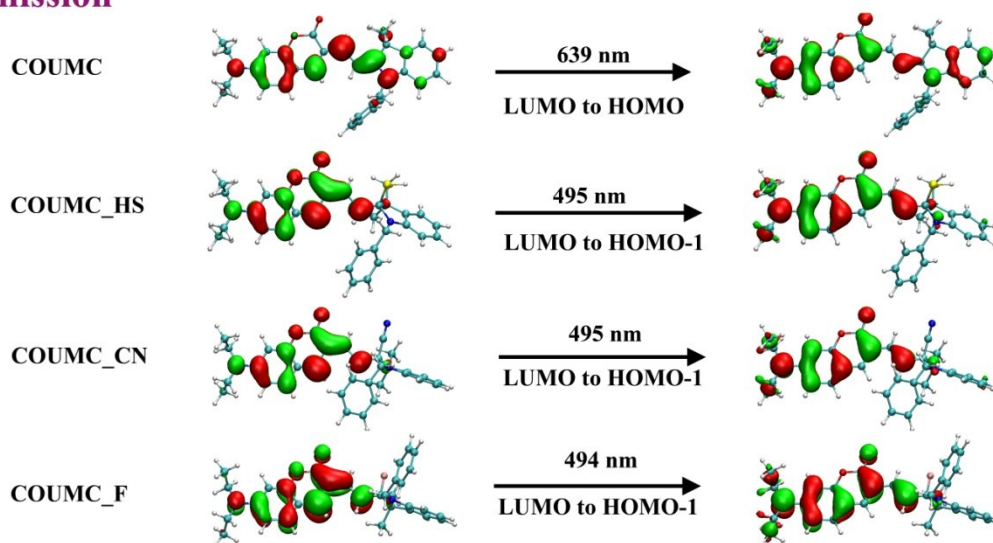

---

## Emission

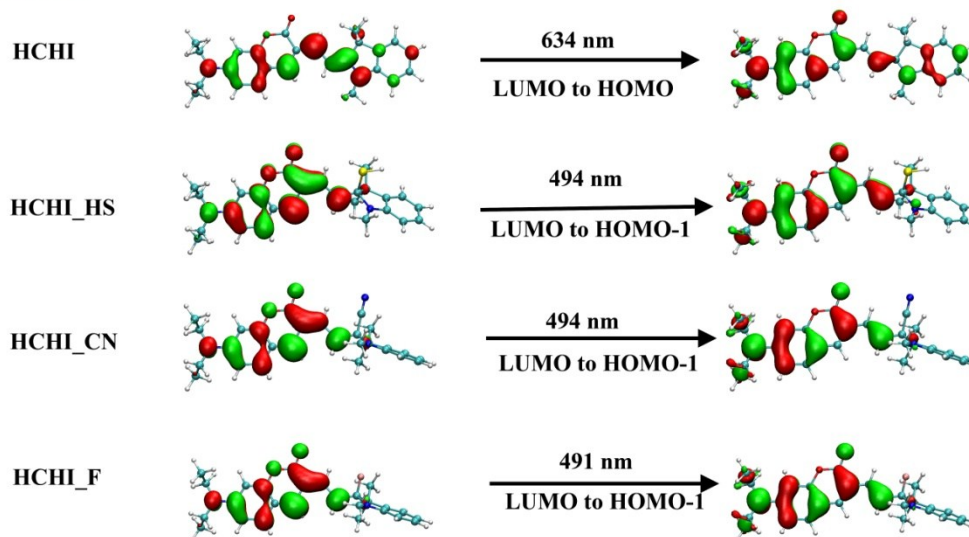

Figure S8 List of emissions



Table S3 MO contributions from each group

| <b>Excitation</b>     |            |           |           |              |
|-----------------------|------------|-----------|-----------|--------------|
| <b>Systems</b>        | <b>MOs</b> | <b>BP</b> | <b>SP</b> | <b>Anion</b> |
| COUMC                 | LUMO       | 64.6%     | 34.4%     | -            |
|                       | HOMO       | 84.5%     | 14.8%     | -            |
| COUMC_HS <sup>-</sup> | LUMO       | 97.9%     | 1.3%      | 0.1%         |
|                       | HOMO       | 59.5%     | 34.1%     | 4.7%         |
|                       | HOMO-1     | 39.5%     | 52.0%     | 5.6%         |
| COUMC_CN <sup>-</sup> | LUMO       | 99.0%     | -0.6%     | 0.9%         |
|                       | HOMO       | 98.4%     | 0.7%      | 0.6%         |
| COUMC_F <sup>-</sup>  | LUMO       | 95.1%     | 4.2%      | 0.0%         |
|                       | HOMO       | 88.9%     | 10.2%     | 0.3%         |
|                       | HOMO-1     | 11.4%     | 81.9%     | 2.3%         |
| HCHI                  | LUMO       | 64.7%     | 33.8%     | -            |
|                       | HOMO       | 85.0%     | 14.3%     | -            |
| HCHI_HS <sup>-</sup>  | LUMO       | 96.7%     | 2.1%      | 1.0%         |
|                       | HOMO       | 70.7%     | 23.3%     | 4.7%         |
|                       | HOMO-1     | 28.9%     | 61.6%     | 5.8%         |
| HCHI_CN <sup>-</sup>  | LUMO       | 97.5%     | 2.0%      | 0.1%         |
|                       | HOMO       | 93.2%     | 6.1%      | 0.3%         |
| HCHI_F <sup>-</sup>   | LUMO       | 97.9%     | 1.7%      | 0.0%         |
|                       | HOMO       | 96.4%     | 3.1%      | 0.2%         |
| <b>Emission</b>       |            |           |           |              |
| <b>System</b>         | <b>MOs</b> | <b>BP</b> | <b>SP</b> | <b>Anion</b> |
| COUMC                 | LUMO       | 63.1%     | 35.4%     | -            |
|                       | HOMO       | 80.3%     | 18.7%     | -            |
| COUMC_HS <sup>-</sup> | LUMO       | 97.1%     | 1.6%      | 0.7%         |
|                       | HOMO-1     | 94.5%     | 4.7%      | 0.3%         |
| COUMC_CN <sup>-</sup> | LUMO       | 96.8%     | 2.7%      | 0.1%         |
|                       | HOMO-1     | 93.9%     | 5.2%      | 0.0%         |
| COUMC_F <sup>-</sup>  | LUMO       | 89.0%     | 1.7%      | 0.1%         |
|                       | HOMO-1     | 90.1%     | 3.4%      | 0.0%         |
| HCHI                  | LUMO       | 63.4%     | 35.0%     | -            |
|                       | HOMO-1     | 80.2%     | 18.9%     | -            |
| HCHI_HS <sup>-</sup>  | LUMO       | 97.1%     | 1.6%      | 0.2%         |
|                       | HOMO-1     | 95.4%     | 3.5%      | 0.1%         |
| HCHI_CN <sup>-</sup>  | LUMO       | 96.7%     | 1.9%      | 0.3%         |
|                       | HOMO-1     | 96.6%     | 2.7%      | 0.2%         |
| HCHI_F <sup>-</sup>   | LUMO       | 97.9%     | 0.6%      | 0.1%         |
|                       | HOMO-1     | 96.9%     | 1.2%      | 0.2%         |

**Appendix: List of coordinates**

**Coordinates for COUMC**

**Coordinates for COUMC\_HS<sup>-</sup> TS**

**Coordinates for COUMC\_CN<sup>-</sup> TS**

**Coordinates for COUMC\_F<sup>-</sup> TS**

**Coordinates for HCHI**

**Coordinates for HCHI\_HS<sup>-</sup> TS**

**Coordinates for HCHI\_CN<sup>-</sup> TS**

**Coordinates for HCHI\_F<sup>-</sup> TS**

**Coordinates for COUMC\_HS<sup>-</sup> Reactant Complex**

**Coordinates for COUMC\_CN<sup>-</sup> Reactant Complex**

**Coordinates for COUMC\_F<sup>-</sup> Reactant Complex**

**Coordinates for HCHI\_HS<sup>-</sup> Reactant Complex**

**Coordinates for HCHI\_CN<sup>-</sup> Reactant Complex**

**Coordinates for HCHI\_F<sup>-</sup> Reactant Complex**

**Coordinates for COUMC**

|   |             |             |             |
|---|-------------|-------------|-------------|
| C | 0.70858500  | -1.37055800 | 0.03235100  |
| C | -0.71095700 | -1.20329900 | 0.03499800  |
| C | -1.49853300 | -2.35401800 | 0.46911500  |
| C | -1.36324600 | -0.03946900 | -0.32272700 |
| C | -3.49968800 | -1.06172700 | 0.13236000  |
| C | -2.75543300 | 0.06169700  | -0.28365700 |
| C | -3.48563600 | 1.22356000  | -0.63212200 |
| H | -2.94041900 | 2.10717000  | -0.94495700 |
| C | -5.59377900 | 0.10235000  | -0.15580200 |
| C | -4.87024500 | -1.06256600 | 0.19975400  |
| H | -0.79617600 | 0.83166800  | -0.63489800 |
| H | 1.04051000  | -2.32500400 | 0.42091000  |
| H | -5.36288600 | -1.97195000 | 0.50950500  |
| O | -2.86233900 | -2.21037400 | 0.48484600  |
| O | -1.06036600 | -3.42517300 | 0.81470600  |
| C | 1.62377400  | -0.46151300 | -0.40374100 |
| H | 1.27942400  | 0.48031800  | -0.80992000 |
| C | 3.02438500  | -0.65350900 | -0.34564000 |
| C | 3.80892500  | -1.82618800 | 0.23292600  |
| C | 3.54269800  | -3.13291300 | -0.53908900 |
| H | 3.69737300  | -2.99020400 | -1.61029100 |
| H | 4.24132300  | -3.89527900 | -0.18915200 |
| H | 2.53068900  | -3.50469500 | -0.37863600 |

|   |             |             |             |
|---|-------------|-------------|-------------|
| C | 3.54187500  | -1.97988400 | 1.74356900  |
| H | 2.52165400  | -2.30799400 | 1.94340200  |
| H | 4.22590300  | -2.72802700 | 2.14851000  |
| H | 3.71309400  | -1.03623400 | 2.26575000  |
| C | 5.22852700  | -1.36220800 | 0.00552900  |
| C | 5.21567700  | -0.11736600 | -0.60249100 |
| C | 6.43308800  | -1.96759500 | 0.31236800  |
| C | 6.37032400  | 0.57869500  | -0.91584400 |
| C | 7.61302600  | -1.29352100 | 0.00090300  |
| H | 6.46492400  | -2.94179300 | 0.78699200  |
| C | 7.57902000  | -0.03784700 | -0.60181700 |
| H | 6.35644600  | 1.55714200  | -1.37834600 |
| H | 8.56794100  | -1.75013800 | 0.23192000  |
| H | 8.50671200  | 0.47261600  | -0.83076500 |
| N | 3.86480600  | 0.26452300  | -0.80508900 |
| C | 3.47039800  | 1.53909800  | -1.40589200 |
| H | 2.73854200  | 1.33937700  | -2.18961500 |
| H | 4.35007900  | 1.94656100  | -1.90209400 |
| C | 2.92441700  | 2.51988900  | -0.38976500 |
| C | 1.85756900  | 3.34388500  | -0.73908100 |
| C | 3.48238000  | 2.62345500  | 0.88313900  |
| C | 1.35560500  | 4.26690100  | 0.17221900  |
| H | 1.41033700  | 3.26019900  | -1.72448300 |
| C | 2.97882000  | 3.54367400  | 1.79454800  |
| H | 4.30917000  | 1.98275000  | 1.17296900  |
| C | 1.91544200  | 4.36847700  | 1.44060400  |
| H | 0.52298400  | 4.90163500  | -0.10874100 |
| H | 3.41928600  | 3.61710800  | 2.78224400  |
| H | 1.52318500  | 5.08476100  | 2.15341700  |
| C | -4.84636600 | 1.25312500  | -0.57366100 |
| H | -5.35738300 | 2.16892400  | -0.83103000 |
| N | -6.94021800 | 0.13264200  | -0.09989400 |
| C | -7.71961300 | -0.99459600 | 0.41073900  |
| H | -7.19966300 | -1.44317400 | 1.25905500  |
| H | -8.64797500 | -0.58327000 | 0.81168400  |
| C | -8.02698800 | -2.03509700 | -0.66130000 |
| H | -8.58506700 | -1.58469500 | -1.48582100 |
| H | -7.11078800 | -2.46977900 | -1.06741600 |
| H | -8.63136100 | -2.84044900 | -0.23808500 |
| C | -7.71730100 | 1.28632000  | -0.55417200 |
| H | -7.24260000 | 1.72467900  | -1.43297900 |
| H | -8.68158200 | 0.90373300  | -0.89457400 |
| C | -7.92295800 | 2.32923100  | 0.53889500  |
| H | -6.96918500 | 2.74056200  | 0.87761300  |

|   |             |            |            |
|---|-------------|------------|------------|
| H | -8.53768600 | 3.14965100 | 0.16196000 |
| H | -8.43005300 | 1.88915400 | 1.40104600 |

**Coordinates for COUMC\_HS- TS**

|   |             |             |             |
|---|-------------|-------------|-------------|
| C | -0.80421900 | -1.47294100 | -0.22941700 |
| C | 0.64563800  | -1.32893200 | -0.16645400 |
| C | 1.45005700  | -2.52802300 | -0.35519200 |
| C | 1.26774300  | -0.12480300 | -0.00962000 |
| C | 3.43595000  | -1.18444500 | -0.14957700 |
| C | 2.67933500  | -0.01748200 | 0.01392700  |
| C | 3.38841800  | 1.18814600  | 0.16996700  |
| H | 2.83048100  | 2.11115800  | 0.28589000  |
| C | 5.52120400  | 0.02209300  | 0.01019200  |
| C | 4.81512300  | -1.18949800 | -0.15023100 |
| H | 0.68037500  | 0.78595200  | 0.07304200  |
| H | -1.17093200 | -2.30118200 | -0.82317500 |
| H | 5.31846600  | -2.13866300 | -0.26188300 |
| O | 2.81209400  | -2.38546900 | -0.32240900 |
| O | 1.02004600  | -3.64537700 | -0.53535900 |
| C | -1.63584600 | -0.61531900 | 0.37806100  |
| H | -1.20781600 | 0.13251200  | 1.03228300  |
| C | -3.07270200 | -0.53465100 | 0.20946200  |
| C | -3.94274200 | -1.38703100 | -0.72038400 |
| C | -4.00747800 | -2.88741100 | -0.44826500 |
| H | -4.43446600 | -3.08404600 | 0.53269400  |
| H | -4.62581200 | -3.35932200 | -1.21613400 |
| H | -3.01895300 | -3.34738700 | -0.48979700 |
| C | -3.45501400 | -1.13560600 | -2.17703700 |
| H | -2.49702300 | -1.61968000 | -2.36631700 |
| H | -4.19388200 | -1.55079800 | -2.86486700 |
| H | -3.35306400 | -0.06875900 | -2.38598500 |
| C | -5.26656400 | -0.67579600 | -0.57387200 |
| C | -5.05001500 | 0.55678300  | 0.03205100  |
| C | -6.53214800 | -1.02598700 | -1.00398300 |
| C | -6.06778700 | 1.47699700  | 0.21959100  |
| C | -7.57663700 | -0.12082600 | -0.81229600 |
| H | -6.71191300 | -1.98330700 | -1.48043400 |
| C | -7.34233000 | 1.11408400  | -0.21368600 |
| H | -5.90447800 | 2.44026200  | 0.68530900  |
| H | -8.57883200 | -0.37923400 | -1.13357700 |
| H | -8.16235800 | 1.80905500  | -0.07572700 |
| N | -3.68738900 | 0.65121400  | 0.38461100  |
| C | -3.12495000 | 1.75879300  | 1.14416000  |

|   |             |             |             |
|---|-------------|-------------|-------------|
| H | -2.84965500 | 1.37396900  | 2.13154300  |
| H | -3.91878300 | 2.48852600  | 1.29894200  |
| C | -1.94151400 | 2.43020900  | 0.47819400  |
| C | -0.92563100 | 2.95737400  | 1.27331400  |
| C | -1.84112300 | 2.53030200  | -0.90735100 |
| C | 0.17673600  | 3.57493100  | 0.69216100  |
| H | -0.98841300 | 2.87062300  | 2.35335100  |
| C | -0.73388000 | 3.13681400  | -1.49016100 |
| H | -2.62384100 | 2.12145100  | -1.53713000 |
| C | 0.27850900  | 3.66097900  | -0.69234500 |
| H | 0.96186600  | 3.97599200  | 1.32332400  |
| H | -0.66136800 | 3.19948900  | -2.56995000 |
| H | 1.14396100  | 4.12879100  | -1.14763100 |
| C | 4.75753000  | 1.21799800  | 0.17060800  |
| H | 5.25314000  | 2.17217900  | 0.27551800  |
| N | 6.87988500  | 0.05251300  | 0.00555500  |
| C | 7.67561200  | -1.13518300 | -0.28425000 |
| H | 7.17348600  | -1.73325300 | -1.04747500 |
| H | 8.60907100  | -0.79437000 | -0.73809000 |
| C | 7.97748600  | -1.97222000 | 0.95558600  |
| H | 8.52320200  | -1.38015600 | 1.69470500  |
| H | 7.05834500  | -2.33580500 | 1.42102600  |
| H | 8.59178000  | -2.83520400 | 0.68751100  |
| C | 7.63214400  | 1.27094400  | 0.28769300  |
| H | 7.11458600  | 1.85298100  | 1.05220800  |
| H | 8.57954900  | 0.96547300  | 0.73793900  |
| C | 7.89691900  | 2.11372000  | -0.95643200 |
| H | 6.96193800  | 2.44104000  | -1.41743600 |
| H | 8.48049400  | 2.99988300  | -0.69526800 |
| H | 8.45943800  | 1.53971900  | -1.69722500 |
| S | -3.54037900 | -1.49613200 | 2.61497200  |
| H | -4.86404300 | -1.28316400 | 2.48777400  |

**Coordinates for COUMC\_CN TS**

|   |             |             |             |
|---|-------------|-------------|-------------|
| C | -0.86453300 | -1.45312200 | -0.14904600 |
| C | 0.58524000  | -1.31824700 | -0.08954700 |
| C | 1.37920800  | -2.51149500 | -0.34718900 |
| C | 1.21704600  | -0.12568200 | 0.11483800  |
| C | 3.37542900  | -1.18707300 | -0.12058800 |
| C | 2.62811000  | -0.02644400 | 0.11833500  |
| C | 3.34644700  | 1.16671700  | 0.32431600  |
| H | 2.79560400  | 2.08451400  | 0.50012200  |
| C | 5.46891900  | 0.00188500  | 0.05625500  |

|   |             |             |             |
|---|-------------|-------------|-------------|
| C | 4.75373700  | -1.19719300 | -0.15285300 |
| H | 0.63798000  | 0.78354300  | 0.25099400  |
| H | -1.23181600 | -2.28131800 | -0.74197600 |
| H | 5.25019500  | -2.14111100 | -0.32371100 |
| O | 2.74227400  | -2.37569400 | -0.33740000 |
| O | 0.94022900  | -3.61791600 | -0.56757700 |
| C | -1.69849700 | -0.59203000 | 0.44737100  |
| H | -1.28289100 | 0.16542200  | 1.09910300  |
| C | -3.13714100 | -0.52058900 | 0.26068400  |
| C | -4.01235100 | -1.46369100 | -0.56683200 |
| C | -4.03327200 | -2.92894800 | -0.14156700 |
| H | -4.44754000 | -3.03530900 | 0.85949500  |
| H | -4.64857900 | -3.49687800 | -0.84348700 |
| H | -3.03255100 | -3.36419700 | -0.15164000 |
| C | -3.57405000 | -1.34728300 | -2.05483800 |
| H | -2.61586700 | -1.83409500 | -2.23388900 |
| H | -4.32782500 | -1.83814000 | -2.67289500 |
| H | -3.49993600 | -0.30447200 | -2.36950100 |
| C | -5.34071500 | -0.75567800 | -0.44668500 |
| C | -5.12033400 | 0.53352800  | 0.02557600  |
| C | -6.61405600 | -1.15782400 | -0.80295900 |
| C | -6.14396000 | 1.45606800  | 0.15969600  |
| C | -7.66331300 | -0.24898800 | -0.66450700 |
| H | -6.79602400 | -2.15780800 | -1.18066300 |
| C | -7.42685700 | 1.03941400  | -0.19294400 |
| H | -5.97959600 | 2.46085100  | 0.52686600  |
| H | -8.67196800 | -0.54738700 | -0.92512100 |
| H | -8.25166400 | 1.73513400  | -0.09265500 |
| N | -3.74502400 | 0.67848500  | 0.31622900  |
| C | -3.19179900 | 1.84633700  | 0.98775300  |
| H | -2.97538600 | 1.57257100  | 2.02719700  |
| H | -3.97430600 | 2.60332000  | 1.01947300  |
| C | -1.96286800 | 2.43053700  | 0.32144200  |
| C | -1.00027800 | 3.05900300  | 1.10898900  |
| C | -1.77340900 | 2.36058600  | -1.05665100 |
| C | 0.13715800  | 3.60983800  | 0.52779700  |
| H | -1.13318100 | 3.10910300  | 2.18495800  |
| C | -0.63032600 | 2.89883000  | -1.63719400 |
| H | -2.51270000 | 1.86991400  | -1.67998800 |
| C | 0.32819200  | 3.52560100  | -0.84722700 |
| H | 0.87931100  | 4.09308300  | 1.15331300  |
| H | -0.48767400 | 2.82470000  | -2.70917600 |
| H | 1.22108700  | 3.94104500  | -1.30022800 |
| C | 4.71499000  | 1.19044700  | 0.29903500  |

|   |             |             |             |
|---|-------------|-------------|-------------|
| H | 5.21809400  | 2.13507600  | 0.44542500  |
| N | 6.82645900  | 0.02849300  | 0.02170800  |
| C | 7.61102900  | -1.14545300 | -0.34569500 |
| H | 7.09336000  | -1.69804500 | -1.13256000 |
| H | 8.53852800  | -0.78365300 | -0.79533300 |
| C | 7.92867300  | -2.05062000 | 0.84123400  |
| H | 8.48552900  | -1.50151300 | 1.60484600  |
| H | 7.01594300  | -2.43936300 | 1.29883000  |
| H | 8.53797700  | -2.89748200 | 0.51658900  |
| C | 7.58990800  | 1.22529300  | 0.36246000  |
| H | 7.09482800  | 1.75575300  | 1.17809600  |
| H | 8.54803300  | 0.88886800  | 0.76530400  |
| C | 7.82409700  | 2.14914500  | -0.82892500 |
| H | 6.87951800  | 2.51642100  | -1.23725600 |
| H | 8.42528600  | 3.00974000  | -0.52573800 |
| H | 8.35693900  | 1.62322800  | -1.62537100 |
| C | -3.66683000 | -1.20559400 | 2.37264800  |
| N | -3.76290600 | -1.34216200 | 3.52653500  |

#### Coordinates for COUMC\_F-TS

|   |             |             |             |
|---|-------------|-------------|-------------|
| C | -0.80885200 | -1.42259300 | -0.17933300 |
| C | 0.63721900  | -1.27031100 | -0.14794400 |
| C | 1.43393000  | -2.45898100 | -0.42318100 |
| C | 1.26859200  | -0.07881400 | 0.07285600  |
| C | 3.42774200  | -1.13968800 | -0.15335500 |
| C | 2.67826800  | 0.02102500  | 0.08340800  |
| C | 3.39708900  | 1.21097300  | 0.31102100  |
| H | 2.84750600  | 2.13004000  | 0.48387700  |
| C | 5.52078600  | 0.03959400  | 0.08205700  |
| C | 4.80569500  | -1.15454900 | -0.15556500 |
| H | 0.68783400  | 0.82728700  | 0.22391800  |
| H | -1.17273800 | -2.27641400 | -0.73682800 |
| H | 5.30186900  | -2.09895100 | -0.32391600 |
| O | 2.79664000  | -2.32374300 | -0.39605400 |
| O | 0.99808700  | -3.56108500 | -0.66832400 |
| C | -1.65372100 | -0.57489000 | 0.42870200  |
| H | -1.24282300 | 0.21547100  | 1.04174700  |
| C | -3.08818800 | -0.59208200 | 0.31641300  |
| C | -3.95927900 | -1.57136800 | -0.46108100 |
| C | -3.86961400 | -3.02838400 | -0.00630500 |
| H | -4.06465800 | -3.09012600 | 1.06225900  |
| H | -4.60119600 | -3.61985700 | -0.56220300 |
| H | -2.88278900 | -3.44971800 | -0.20497600 |

|   |             |             |             |
|---|-------------|-------------|-------------|
| C | -3.62718300 | -1.43691300 | -1.97090500 |
| H | -2.64482200 | -1.84798800 | -2.20299400 |
| H | -4.37489500 | -1.99253500 | -2.54009100 |
| H | -3.65500900 | -0.39371000 | -2.29399900 |
| C | -5.32277000 | -0.96104800 | -0.24028100 |
| C | -5.17220500 | 0.28177200  | 0.35861300  |
| C | -6.58091800 | -1.41194600 | -0.59137600 |
| C | -6.24305200 | 1.11796200  | 0.62099900  |
| C | -7.68013900 | -0.59511100 | -0.32402600 |
| H | -6.71475700 | -2.37866900 | -1.06402400 |
| C | -7.50963000 | 0.65274900  | 0.26967300  |
| H | -6.12511300 | 2.08987700  | 1.08252000  |
| H | -8.67663200 | -0.93367200 | -0.58236300 |
| H | -8.37377100 | 1.27596400  | 0.46737300  |
| N | -3.79597300 | 0.48876900  | 0.61472500  |
| C | -3.26005900 | 1.66717100  | 1.29020700  |
| H | -2.77410200 | 1.33396100  | 2.20906700  |
| H | -4.10552500 | 2.28655500  | 1.58673500  |
| C | -2.30920500 | 2.46484000  | 0.42306600  |
| C | -1.17248300 | 3.03600400  | 0.99086500  |
| C | -2.55136900 | 2.63726100  | -0.93795300 |
| C | -0.28597300 | 3.76787700  | 0.20760400  |
| H | -0.97070800 | 2.89668400  | 2.04829400  |
| C | -1.66349400 | 3.36363500  | -1.72257600 |
| H | -3.43208900 | 2.19546200  | -1.39258800 |
| C | -0.52744600 | 3.92977900  | -1.15210200 |
| H | 0.59818300  | 4.20284500  | 0.65971600  |
| H | -1.85853900 | 3.48733100  | -2.78175700 |
| H | 0.16611700  | 4.49323200  | -1.76571000 |
| C | 4.76545100  | 1.23025600  | 0.31329400  |
| H | 5.26847000  | 2.17234700  | 0.47544000  |
| N | 6.87789100  | 0.05881300  | 0.08576200  |
| C | 7.66568300  | -1.12042700 | -0.25850400 |
| H | 7.17054500  | -1.66723700 | -1.06365500 |
| H | 8.61019900  | -0.76452400 | -0.67611100 |
| C | 7.93598700  | -2.03014400 | 0.93651400  |
| H | 8.47147600  | -1.48720600 | 1.71959700  |
| H | 7.00526300  | -2.41186000 | 1.36283400  |
| H | 8.54851100  | -2.88161300 | 0.63063700  |
| C | 7.63949200  | 1.25214400  | 0.44345800  |
| H | 7.12570700  | 1.78982000  | 1.24239900  |
| H | 8.58342800  | 0.91078500  | 0.87439000  |
| C | 7.91286900  | 2.16751000  | -0.74603300 |
| H | 6.98216100  | 2.53903600  | -1.18146800 |



|   |             |             |             |
|---|-------------|-------------|-------------|
| H | 8.51191100  | 3.02542400  | -0.43140700 |
| H | 8.46325300  | 1.63296100  | -1.52456300 |
| F | -3.26920600 | -1.43614100 | 2.41112100  |

### Coordinates for HCHI

|   |             |             |             |
|---|-------------|-------------|-------------|
| C | 1.20073100  | -0.59168000 | 0.05545600  |
| C | -0.22901800 | -0.53584800 | 0.03888800  |
| C | -0.92277500 | -1.81759100 | 0.13591200  |
| C | -0.97142400 | 0.62427200  | -0.05110000 |
| C | -3.02059000 | -0.64508100 | 0.03874300  |
| C | -2.36926100 | 0.60176900  | -0.05301000 |
| C | -3.19130900 | 1.75129900  | -0.13622100 |
| H | -2.71979300 | 2.72548600  | -0.20141600 |
| C | -5.20251500 | 0.38276600  | -0.03569300 |
| C | -4.38715000 | -0.77275800 | 0.04406700  |
| H | -0.47474000 | 1.58689800  | -0.11791200 |
| H | 1.59569900  | -1.59162800 | 0.18204400  |
| H | -4.80502100 | -1.76703000 | 0.09531600  |
| O | -2.29317400 | -1.79121200 | 0.12218300  |
| O | -0.40053300 | -2.90323100 | 0.22479500  |
| C | 2.05822800  | 0.45706400  | -0.07162500 |
| H | 1.66415400  | 1.45494300  | -0.21496200 |
| C | 3.46953900  | 0.32850300  | -0.03786200 |
| C | 4.31237100  | -0.93158400 | 0.13058200  |
| C | 4.09184900  | -1.92970400 | -1.02273800 |
| H | 4.21980600  | -1.44193200 | -1.99101800 |
| H | 4.83061800  | -2.72917400 | -0.94030200 |
| H | 3.10053000  | -2.38164300 | -0.98792700 |
| C | 4.07962400  | -1.58327500 | 1.50831000  |
| H | 3.08360700  | -2.01922500 | 1.58914400  |
| H | 4.81112700  | -2.38144200 | 1.64787000  |
| H | 4.20788100  | -0.85414200 | 2.31079900  |
| C | 5.70592800  | -0.35388900 | 0.05883500  |
| C | 5.62865400  | 1.01847600  | -0.11612300 |
| C | 6.93998100  | -0.97185900 | 0.14204800  |
| C | 6.74856200  | 1.82535000  | -0.22184200 |
| C | 8.08525700  | -0.18316800 | 0.04349000  |
| H | 7.02054300  | -2.04400700 | 0.28145900  |
| C | 7.98752500  | 1.19489500  | -0.13750000 |
| H | 6.68678500  | 2.89579200  | -0.36707100 |
| H | 9.06231700  | -0.64681000 | 0.10764800  |
| H | 8.88900300  | 1.79074000  | -0.21494700 |
| N | 4.25841500  | 1.38485300  | -0.15966600 |

|   |             |             |             |
|---|-------------|-------------|-------------|
| C | 3.79659500  | 2.75867900  | -0.32439900 |
| H | 3.30458000  | 2.87358800  | -1.29056500 |
| H | 4.64846700  | 3.42950000  | -0.27816800 |
| C | -4.55074500 | 1.65641400  | -0.12849800 |
| H | -5.13445000 | 2.56381500  | -0.17451700 |
| N | -6.54777900 | 0.29091000  | -0.02145500 |
| C | -7.23327800 | -0.98671700 | 0.16594200  |
| H | -6.67393100 | -1.59807600 | 0.87564600  |
| H | -8.19013500 | -0.76918000 | 0.64458600  |
| C | -7.45993500 | -1.73147700 | -1.14572900 |
| H | -8.06704500 | -1.13173700 | -1.82825600 |
| H | -6.51222100 | -1.95766800 | -1.63987300 |
| H | -7.98315300 | -2.67159400 | -0.95765400 |
| C | -7.41501000 | 1.45558400  | -0.19965700 |
| H | -6.97232000 | 2.13450500  | -0.92992300 |
| H | -8.34112700 | 1.09372100  | -0.65047100 |
| C | -7.71702900 | 2.17507900  | 1.11036700  |
| H | -6.80486600 | 2.56730000  | 1.56595800  |
| H | -8.39862900 | 3.00938000  | 0.93000300  |
| H | -8.18979700 | 1.49476000  | 1.82301100  |
| H | 3.10849400  | 3.01694500  | 0.47966100  |

#### Coordinates for HCHI\_HS

|   |             |             |             |
|---|-------------|-------------|-------------|
| C | -0.94552500 | -0.73091800 | -0.01830900 |
| C | 0.50822500  | -0.63831800 | -0.04560000 |
| C | 1.22785300  | -1.88786600 | -0.27243900 |
| C | 1.22002100  | 0.51057500  | 0.14310800  |
| C | 3.30433900  | -0.68224700 | -0.13614500 |
| C | 2.63539200  | 0.52538200  | 0.09971300  |
| C | 3.43410600  | 1.67110300  | 0.28176200  |
| H | 2.94937400  | 2.62526500  | 0.45792900  |
| C | 5.47296000  | 0.36991500  | -0.00955900 |
| C | 4.67833400  | -0.78218900 | -0.19154600 |
| H | 0.70554800  | 1.44487100  | 0.34586600  |
| H | -1.32677400 | -1.73740100 | 0.09246700  |
| H | 5.11024300  | -1.75920500 | -0.35164700 |
| O | 2.59503900  | -1.83367500 | -0.30758300 |
| O | 0.72181100  | -2.97545600 | -0.43626300 |
| C | -1.78793300 | 0.30685800  | -0.12596800 |
| H | -1.38779000 | 1.30494800  | -0.25863100 |
| C | -3.23728700 | 0.22252700  | -0.05528000 |
| C | -4.08226000 | -1.06373900 | -0.04957200 |
| C | -3.93186100 | -2.02565900 | 1.12641400  |

|   |             |             |             |
|---|-------------|-------------|-------------|
| H | -4.19203200 | -1.53697300 | 2.06286200  |
| H | -4.59440100 | -2.88023700 | 0.96648000  |
| H | -2.91515500 | -2.41106800 | 1.21238000  |
| C | -3.79515500 | -1.81201200 | -1.38267600 |
| H | -2.80447400 | -2.26765000 | -1.38060100 |
| H | -4.53730100 | -2.60377700 | -1.50158500 |
| H | -3.86753300 | -1.13847800 | -2.23945800 |
| C | -5.46659200 | -0.46903200 | -0.16309400 |
| C | -5.35201600 | 0.86283100  | -0.54567000 |
| C | -6.71321100 | -1.04530800 | -0.01538000 |
| C | -6.45944600 | 1.66029600  | -0.78360200 |
| C | -7.84442200 | -0.26056600 | -0.24703400 |
| H | -6.81572800 | -2.08465500 | 0.27667700  |
| C | -7.71441100 | 1.07235200  | -0.62678000 |
| H | -6.37309800 | 2.70102200  | -1.06867700 |
| H | -8.83130000 | -0.69176200 | -0.12674300 |
| H | -8.60211800 | 1.66985100  | -0.79905600 |
| N | -3.98660600 | 1.19659700  | -0.61431400 |
| C | -3.51737900 | 2.54001900  | -0.88952500 |
| H | -3.28581400 | 3.04797300  | 0.05159300  |
| H | -4.29295700 | 3.08687700  | -1.41957200 |
| C | 4.80083300  | 1.60713600  | 0.22712100  |
| H | 5.36562400  | 2.51991800  | 0.34967400  |
| N | 6.82905100  | 0.30655300  | -0.05955200 |
| C | 7.52915200  | -0.92277400 | -0.41440600 |
| H | 6.96947600  | -1.44958300 | -1.19012500 |
| H | 8.47624700  | -0.63253500 | -0.87500300 |
| C | 7.79179300  | -1.83164200 | 0.78327900  |
| H | 8.39839200  | -1.31549700 | 1.53181000  |
| H | 6.85743900  | -2.14156500 | 1.25711700  |
| H | 8.33001600  | -2.72783300 | 0.46564900  |
| C | 7.67400300  | 1.45325800  | 0.25978000  |
| H | 7.21513300  | 2.03397800  | 1.06197900  |
| H | 8.60554600  | 1.05912100  | 0.67274300  |
| C | 7.97408200  | 2.33269700  | -0.95026600 |
| H | 7.05762700  | 2.75702500  | -1.36737100 |
| H | 8.63534700  | 3.15424800  | -0.66440000 |
| H | 8.46840000  | 1.75313500  | -1.73420200 |
| S | -3.30552600 | 1.03990900  | 2.37400400  |
| H | -4.64954200 | 1.12455700  | 2.39074500  |
| H | -2.63345900 | 2.51181500  | -1.52507600 |

**Coordinates for HCHI\_CN<sup>-</sup>**

|   |             |             |             |
|---|-------------|-------------|-------------|
| C | 1.00328900  | 0.68029000  | -0.07774400 |
| C | -0.44981300 | 0.59752300  | -0.08838500 |
| C | -1.16141300 | 1.86232100  | -0.24623700 |
| C | -1.17061900 | -0.55497700 | 0.04869800  |
| C | -3.24654100 | 0.66934100  | -0.12505400 |
| C | -2.58401800 | -0.55547300 | 0.03368600  |
| C | -3.38940100 | -1.70406400 | 0.16961600  |
| H | -2.90929500 | -2.66945100 | 0.28728700  |
| C | -5.42084300 | -0.37231300 | -0.01259500 |
| C | -4.61963500 | 0.78251900  | -0.14752000 |
| H | -0.66419900 | -1.50606500 | 0.18028200  |
| H | 1.38479000  | 1.69250500  | -0.08486900 |
| H | -5.04634800 | 1.76950200  | -0.24938500 |
| O | -2.53000900 | 1.82090000  | -0.25464100 |
| O | -0.65031500 | 2.95227300  | -0.37221700 |
| C | 1.85023900  | -0.35865700 | -0.06446100 |
| H | 1.46274200  | -1.36978800 | -0.05292800 |
| C | 3.30136500  | -0.24797900 | -0.02430400 |
| C | 4.12772300  | 1.04437300  | -0.11515900 |
| C | 3.94125900  | 2.08035900  | 0.99057500  |
| H | 4.18465800  | 1.65602700  | 1.96318700  |
| H | 4.60562000  | 2.92602100  | 0.79659600  |
| H | 2.92239700  | 2.46752100  | 1.02449800  |
| C | 3.85502500  | 1.68783200  | -1.50284900 |
| H | 2.86130900  | 2.13384500  | -1.55307700 |
| H | 4.59203400  | 2.47563000  | -1.66910400 |
| H | 3.94843800  | 0.95307700  | -2.30537100 |
| C | 5.51873600  | 0.45538800  | -0.15943600 |
| C | 5.42076600  | -0.90394200 | -0.43271800 |
| C | 6.75951100  | 1.05293300  | -0.04619100 |
| C | 6.53626200  | -1.71064200 | -0.58560300 |
| C | 7.89860700  | 0.25998800  | -0.19376300 |
| H | 6.85144200  | 2.11389300  | 0.15826800  |
| C | 7.78440300  | -1.10187400 | -0.45972000 |
| H | 6.45969200  | -2.77196300 | -0.78456200 |
| H | 8.88056300  | 0.70756700  | -0.09512400 |
| H | 8.67899600  | -1.70437100 | -0.56577100 |
| N | 4.05802800  | -1.25687400 | -0.50043100 |
| C | 3.62553600  | -2.63761200 | -0.58428000 |
| H | 3.52551700  | -3.05673300 | 0.42342700  |
| H | 4.36217500  | -3.20813800 | -1.14471100 |
| C | -4.75535100 | -1.62641300 | 0.14620200  |
| H | -5.32630200 | -2.53941700 | 0.23235100  |
| N | -6.77565300 | -0.29664400 | -0.03511100 |

|   |             |             |             |
|---|-------------|-------------|-------------|
| C | -7.47183300 | 0.95702500  | -0.30404900 |
| H | -6.91772400 | 1.52723500  | -1.05215500 |
| H | -8.42665500 | 0.70205500  | -0.76947300 |
| C | -7.71073200 | 1.78938000  | 0.95260200  |
| H | -8.31387400 | 1.23186400  | 1.67366200  |
| H | -6.76705300 | 2.05788700  | 1.43322700  |
| H | -8.24279400 | 2.70970700  | 0.70052200  |
| C | -7.62510100 | -1.45290500 | 0.23616000  |
| H | -7.16119400 | -2.07740100 | 1.00172700  |
| H | -8.54841000 | -1.07375700 | 0.67998400  |
| C | -7.94655200 | -2.26694100 | -1.01340600 |
| H | -7.03873100 | -2.67611600 | -1.46309100 |
| H | -8.61038500 | -3.09727400 | -0.76091200 |
| H | -8.44636900 | -1.64431200 | -1.75982000 |
| C | 3.51053500  | -0.72112600 | 2.14788100  |
| N | 3.42852000  | -1.22227600 | 3.19699200  |
| H | 2.67687000  | -2.71049200 | -1.11161400 |

#### Coordinates for HCHI\_F-

|   |             |             |             |
|---|-------------|-------------|-------------|
| C | -1.07151800 | -0.64658800 | -0.14271200 |
| C | 0.38029100  | -0.56869900 | -0.14775100 |
| C | 1.08990900  | -1.82639200 | -0.36233300 |
| C | 1.10400600  | 0.57487300  | 0.04550000  |
| C | 3.17756800  | -0.64747400 | -0.16333300 |
| C | 2.51657400  | 0.57142700  | 0.04321100  |
| C | 3.32342000  | 1.70979800  | 0.24370900  |
| H | 2.84443200  | 2.67063500  | 0.39744500  |
| C | 5.35291200  | 0.37903700  | 0.03561700  |
| C | 4.55030600  | -0.76466300 | -0.17008900 |
| H | 0.59929300  | 1.52101600  | 0.21371000  |
| H | -1.45748000 | -1.65324600 | -0.23212500 |
| H | 4.97559700  | -1.74720500 | -0.31239500 |
| O | 2.45910300  | -1.78854300 | -0.35766100 |
| O | 0.57756100  | -2.90736400 | -0.54578400 |
| C | -1.91507300 | 0.39303500  | -0.03787200 |
| H | -1.52363700 | 1.39747500  | 0.05684800  |
| C | -3.35317600 | 0.28213800  | 0.00072100  |
| C | -4.19536200 | -0.99404000 | -0.04599400 |
| C | -3.94904300 | -1.99744100 | 1.08057600  |
| H | -4.03609900 | -1.49501400 | 2.04162600  |
| H | -4.68499000 | -2.80186800 | 1.00528100  |
| H | -2.95824100 | -2.44862900 | 1.00847000  |
| C | -4.00561800 | -1.65933800 | -1.43520500 |

|   |             |             |             |
|---|-------------|-------------|-------------|
| H | -3.01323000 | -2.09796500 | -1.54280100 |
| H | -4.74414000 | -2.45660900 | -1.54040600 |
| H | -4.15869800 | -0.94000300 | -2.24302800 |
| C | -5.58491900 | -0.40210200 | -0.01299900 |
| C | -5.49292700 | 0.97027600  | -0.19400100 |
| C | -6.82372700 | -1.00182200 | 0.10461400  |
| C | -6.60472600 | 1.79148800  | -0.25567800 |
| C | -7.96314400 | -0.19636800 | 0.05099700  |
| H | -6.91495800 | -2.07358800 | 0.24221600  |
| C | -7.85171500 | 1.17961400  | -0.12754200 |
| H | -6.52654800 | 2.86349700  | -0.38455100 |
| H | -8.94350100 | -0.64671500 | 0.15313500  |
| H | -8.74618200 | 1.79053700  | -0.16288300 |
| N | -4.12738700 | 1.32273200  | -0.28406300 |
| C | -3.69244500 | 2.70237000  | -0.41306300 |
| H | -3.58257600 | 3.15311800  | 0.57494200  |
| H | -4.43412600 | 3.25259700  | -0.98815300 |
| C | 4.68901600  | 1.62784800  | 0.23915200  |
| H | 5.26155200  | 2.53354500  | 0.37675900  |
| N | 6.70723500  | 0.29790700  | 0.03848800  |
| C | 7.40455800  | -0.94544600 | -0.27287000 |
| H | 6.87238600  | -1.47237500 | -1.06750400 |
| H | 8.37483700  | -0.67307800 | -0.69409500 |
| C | 7.59974500  | -1.84351700 | 0.94537200  |
| H | 8.17955700  | -1.32703000 | 1.71459900  |
| H | 6.64085900  | -2.13437200 | 1.38062900  |
| H | 8.13834500  | -2.75096400 | 0.66241200  |
| C | 7.55540100  | 1.43893000  | 0.37225400  |
| H | 7.07969600  | 2.03327200  | 1.15428200  |
| H | 8.46910200  | 1.03808600  | 0.81681400  |
| C | 7.90172500  | 2.30068100  | -0.83808700 |
| H | 7.00331200  | 2.73063900  | -1.28727000 |
| H | 8.56371800  | 3.11777000  | -0.54154100 |
| H | 8.41261600  | 1.70601500  | -1.59968700 |
| F | -3.34953700 | 0.64623200  | 2.16032400  |
| H | -2.74951000 | 2.75141300  | -0.95223400 |

**Coordinates for COUMC\_HS<sup>-</sup> Reactant Complex**

|   |             |             |             |
|---|-------------|-------------|-------------|
| C | -0.59352200 | -1.28671200 | -0.42889400 |
| C | 0.83234300  | -1.16110600 | -0.34400600 |
| C | 1.61629500  | -2.31263800 | -0.77962200 |
| C | 1.48721500  | -0.02557500 | 0.08265600  |
| C | 3.62397400  | -1.08244100 | -0.28609700 |

|   |             |             |             |
|---|-------------|-------------|-------------|
| C | 2.88428000  | 0.04426700  | 0.12320400  |
| C | 3.61929700  | 1.17742600  | 0.54318300  |
| H | 3.07781200  | 2.06418200  | 0.85394800  |
| C | 5.72565600  | 0.02256800  | 0.14431700  |
| C | 4.99691900  | -1.11438400 | -0.28056700 |
| H | 0.92252800  | 0.85283100  | 0.38056500  |
| H | -0.93444600 | -2.17849200 | -0.93947200 |
| H | 5.48493500  | -2.02590500 | -0.59165600 |
| O | 2.98135600  | -2.20390300 | -0.71115500 |
| O | 1.17306100  | -3.35821100 | -1.19206200 |
| C | -1.48980900 | -0.39524000 | 0.06758400  |
| H | -1.12475800 | 0.46447400  | 0.61116500  |
| C | -2.89434800 | -0.48485700 | -0.09868100 |
| C | -3.70603800 | -1.57020900 | -0.79316800 |
| C | -3.52512200 | -2.94419700 | -0.12270200 |
| H | -3.70535700 | -2.87542600 | 0.95199600  |
| H | -4.24206400 | -3.64472000 | -0.55541600 |
| H | -2.52414100 | -3.34565600 | -0.28258000 |
| C | -3.38552300 | -1.61645700 | -2.30189000 |
| H | -2.37284300 | -1.97435700 | -2.48854500 |
| H | -4.08368900 | -2.30020100 | -2.78855200 |
| H | -3.49645100 | -0.62946600 | -2.75604800 |
| C | -5.10938600 | -1.05245200 | -0.58626800 |
| C | -5.05931400 | 0.16053100  | 0.08275800  |
| C | -6.32908600 | -1.58506000 | -0.96078100 |
| C | -6.19218200 | 0.89008800  | 0.39989900  |
| C | -7.48716800 | -0.87430800 | -0.64942800 |
| H | -6.38867900 | -2.53363400 | -1.48239000 |
| C | -7.41636000 | 0.34595000  | 0.01928000  |
| H | -6.15142400 | 1.83950000  | 0.91753400  |
| H | -8.45366700 | -1.27541700 | -0.93026200 |
| H | -8.32765700 | 0.88407600  | 0.25094500  |
| N | -3.70048400 | 0.46481000  | 0.35036900  |
| C | -3.26662000 | 1.65877400  | 1.07906800  |
| H | -2.73636700 | 1.32292500  | 1.97339900  |
| H | -4.16454100 | 2.16800300  | 1.42442800  |
| C | -2.41906100 | 2.58822000  | 0.23814300  |
| C | -1.31655400 | 3.21504700  | 0.81423300  |
| C | -2.72020300 | 2.82696300  | -1.10095100 |
| C | -0.52103900 | 4.07083400  | 0.06000800  |
| H | -1.07138800 | 3.02425100  | 1.85429200  |
| C | -1.92307000 | 3.67895500  | -1.85605200 |
| H | -3.57275600 | 2.33945800  | -1.56322300 |
| C | -0.82130600 | 4.30223200  | -1.27760400 |

|   |             |             |             |
|---|-------------|-------------|-------------|
| H | 0.33881400  | 4.54764900  | 0.51657400  |
| H | -2.16073600 | 3.85439600  | -2.89901700 |
| H | -0.19728600 | 4.96156900  | -1.86990800 |
| C | 4.98267700  | 1.17649700  | 0.55750000  |
| H | 5.49892000  | 2.07186800  | 0.87043100  |
| N | 7.07530200  | 0.02422700  | 0.15563600  |
| C | 7.85388100  | -1.10411900 | -0.35196800 |
| H | 7.36086200  | -1.52060700 | -1.23218500 |
| H | 8.80617200  | -0.70202100 | -0.70344500 |
| C | 8.09563100  | -2.17853300 | 0.70333300  |
| H | 8.62590600  | -1.76066100 | 1.56256400  |
| H | 7.15431700  | -2.60466000 | 1.05795900  |
| H | 8.70227400  | -2.98481900 | 0.28499700  |
| C | 7.85204300  | 1.14940100  | 0.67546400  |
| H | 7.34942200  | 1.57117000  | 1.54711500  |
| H | 8.79489300  | 0.74008000  | 1.04375200  |
| C | 8.12062800  | 2.21943600  | -0.37737700 |
| H | 7.18886400  | 2.65580800  | -0.74473300 |
| H | 8.73121700  | 3.01915600  | 0.04788900  |
| H | 8.65706700  | 1.79475600  | -1.22947400 |
| S | -3.53130900 | -1.13101300 | 3.62474300  |
| H | -4.43463200 | -1.08365800 | 2.62771800  |

**Coordinates for COUMC\_CN<sup>-</sup> Reactant Complex**

|   |             |             |             |
|---|-------------|-------------|-------------|
| C | -0.68422200 | -1.33230600 | -0.31934900 |
| C | 0.74486800  | -1.19713300 | -0.25601200 |
| C | 1.53024300  | -2.35773000 | -0.66297600 |
| C | 1.39690800  | -0.04541400 | 0.12333800  |
| C | 3.53660700  | -1.10020200 | -0.23689200 |
| C | 2.79572800  | 0.03402900  | 0.14510900  |
| C | 3.52843700  | 1.18364900  | 0.51907900  |
| H | 2.98558500  | 2.07707600  | 0.80772700  |
| C | 5.63722600  | 0.02910300  | 0.13170200  |
| C | 4.91036200  | -1.12413600 | -0.24820500 |
| H | 0.83035900  | 0.83990500  | 0.39681300  |
| H | -1.02896300 | -2.23495700 | -0.80787900 |
| H | 5.39986300  | -2.04249800 | -0.53597800 |
| O | 2.89524600  | -2.23874200 | -0.61727400 |
| O | 1.08775600  | -3.41937800 | -1.03394200 |
| C | -1.57215400 | -0.43309100 | 0.17197500  |
| H | -1.20004000 | 0.43370500  | 0.69848500  |
| C | -2.98148100 | -0.52385100 | 0.03250200  |
| C | -3.80723600 | -1.63576300 | -0.59812600 |



|   |             |             |             |
|---|-------------|-------------|-------------|
| C | -3.60747800 | -2.97984000 | 0.12447400  |
| H | -3.76246600 | -2.85973700 | 1.19839700  |
| H | -4.33232600 | -3.69944200 | -0.26161300 |
| H | -2.60888600 | -3.38461100 | -0.04366100 |
| C | -3.52212200 | -1.74140600 | -2.11123100 |
| H | -2.51475700 | -2.10867000 | -2.30769800 |
| H | -4.23269800 | -2.44207100 | -2.55397400 |
| H | -3.64215700 | -0.77218700 | -2.60011200 |
| C | -5.20528800 | -1.10867000 | -0.38151200 |
| C | -5.13908800 | 0.13295300  | 0.23126300  |
| C | -6.43323100 | -1.65571600 | -0.70439100 |
| C | -6.26437900 | 0.87725300  | 0.54086000  |
| C | -7.58400400 | -0.93070900 | -0.39820000 |
| H | -6.50475900 | -2.62594900 | -1.18294900 |
| C | -7.49732800 | 0.31795200  | 0.21383700  |
| H | -6.21183300 | 1.84759400  | 1.01694500  |
| H | -8.55690700 | -1.34315200 | -0.63747000 |
| H | -8.40295900 | 0.86660700  | 0.44322900  |
| N | -3.77454500 | 0.44768800  | 0.45206200  |
| C | -3.32241700 | 1.67960800  | 1.10367000  |
| H | -2.79247100 | 1.38748700  | 2.01352300  |
| H | -4.21318700 | 2.22133900  | 1.41661900  |
| C | -2.46800000 | 2.54610500  | 0.20468500  |
| C | -1.34274100 | 3.17384300  | 0.73428500  |
| C | -2.78200900 | 2.72645300  | -1.14074900 |
| C | -0.53711800 | 3.97156600  | -0.07105000 |
| H | -1.08779100 | 3.02793400  | 1.77931700  |
| C | -1.97494800 | 3.52039100  | -1.94707200 |
| H | -3.65315600 | 2.23885600  | -1.56721800 |
| C | -0.85030300 | 4.14374700  | -1.41461000 |
| H | 0.33996800  | 4.44913400  | 0.35066100  |
| H | -2.22323500 | 3.65148600  | -2.99414200 |
| H | -0.21964600 | 4.75882200  | -2.04625100 |
| C | 4.89257400  | 1.19083300  | 0.51678300  |
| H | 5.40705600  | 2.09891700  | 0.79417500  |
| N | 6.98796800  | 0.03851000  | 0.12692300  |
| C | 7.76643300  | -1.10003700 | -0.35650600 |
| H | 7.26710200  | -1.54220500 | -1.22074700 |
| H | 8.71380200  | -0.70408800 | -0.72792100 |
| C | 8.02330000  | -2.14546200 | 0.72422500  |
| H | 8.56077300  | -1.70328500 | 1.56674100  |
| H | 7.08767900  | -2.56592100 | 1.10011700  |
| H | 8.62893000  | -2.96019600 | 0.32099600  |
| C | 7.76339100  | 1.18210100  | 0.60589700  |

|   |             |             |             |
|---|-------------|-------------|-------------|
| H | 7.26692900  | 1.62586300  | 1.47029100  |
| H | 8.71231400  | 0.78885200  | 0.97636200  |
| C | 8.01595300  | 2.22422000  | -0.47855000 |
| H | 7.07840100  | 2.64563200  | -0.84876500 |
| H | 8.62629500  | 3.03846900  | -0.08136400 |
| H | 8.54654900  | 1.77926400  | -1.32400200 |
| C | -3.55386400 | -1.21089800 | 3.42541800  |
| N | -2.72815200 | -0.39929300 | 3.60087700  |

**Coordinates for COUMC\_F<sup>-</sup> Reactant Complex**

|   |             |             |             |
|---|-------------|-------------|-------------|
| C | -0.62859300 | -1.39771900 | -0.19981800 |
| C | 0.79682600  | -1.21943800 | -0.18795000 |
| C | 1.58266900  | -2.18038900 | -0.95268800 |
| C | 1.43491000  | -0.20342200 | 0.49406900  |
| C | 3.57543300  | -0.99197000 | -0.31860800 |
| C | 2.83218300  | -0.07299000 | 0.44356500  |
| C | 3.55770800  | 0.94084500  | 1.10886800  |
| H | 3.00935500  | 1.66818300  | 1.69724900  |
| C | 5.66307200  | 0.08497000  | 0.23616100  |
| C | 4.94497900  | -0.93404500 | -0.43234600 |
| H | 0.85689500  | 0.50974400  | 1.09853800  |
| H | -0.96658400 | -2.28041000 | -0.72914100 |
| H | 5.43914700  | -1.69392500 | -1.01969100 |
| O | 2.94319700  | -2.00297400 | -0.97550300 |
| O | 1.15014200  | -3.12317800 | -1.57586800 |
| C | -1.51863400 | -0.53938100 | 0.36557800  |
| H | -1.14239200 | 0.34107100  | 0.88572300  |
| C | -2.92299100 | -0.72513600 | 0.35301700  |
| C | -3.73497600 | -1.92361500 | -0.12488400 |
| C | -3.36587400 | -3.20962300 | 0.63318600  |
| H | -3.46220800 | -3.06651200 | 1.71127600  |
| H | -4.04456500 | -4.00906700 | 0.32899900  |
| H | -2.34577700 | -3.52637600 | 0.41373100  |
| C | -3.60649500 | -2.09684400 | -1.65364400 |
| H | -2.60941000 | -2.42815800 | -1.94314200 |
| H | -4.32434000 | -2.85052000 | -1.98314700 |
| H | -3.82718500 | -1.16061600 | -2.17085900 |
| C | -5.13736800 | -1.47624000 | 0.21326700  |
| C | -5.09272200 | -0.19894000 | 0.74970500  |
| C | -6.35307400 | -2.11404300 | 0.04867700  |
| C | -6.22827100 | 0.49203900  | 1.13673500  |
| C | -7.51303300 | -1.44333600 | 0.43476300  |
| H | -6.40865200 | -3.11157700 | -0.37255300 |

|   |             |             |             |
|---|-------------|-------------|-------------|
| C | -7.44843900 | -0.15835200 | 0.96969200  |
| H | -6.18915400 | 1.49161300  | 1.55029900  |
| H | -8.47602500 | -1.92533100 | 0.31558000  |
| H | -8.36070700 | 0.34808700  | 1.26139300  |
| N | -3.73852200 | 0.21434600  | 0.81175800  |
| C | -3.32754700 | 1.56952800  | 1.20848900  |
| H | -2.42417300 | 1.50701800  | 1.82140300  |
| H | -4.12640100 | 1.97743900  | 1.82641300  |
| C | -3.06687400 | 2.43492300  | -0.00710200 |
| C | -1.80143200 | 2.98811400  | -0.19220600 |
| C | -4.06823500 | 2.67313400  | -0.94995700 |
| C | -1.54324800 | 3.77839700  | -1.30921000 |
| H | -1.02927900 | 2.77268100  | 0.54398700  |
| C | -3.80538200 | 3.45565300  | -2.06744900 |
| H | -5.05693800 | 2.24519400  | -0.81766700 |
| C | -2.54142800 | 4.01172700  | -2.24822900 |
| H | -0.55693700 | 4.20743000  | -1.44876800 |
| H | -4.58753700 | 3.63437200  | -2.79679500 |
| H | -2.33735000 | 4.62280500  | -3.12051300 |
| C | 4.91709700  | 1.02673000  | 1.01461500  |
| H | 5.42284700  | 1.83403600  | 1.52367700  |
| N | 7.00996000  | 0.17031800  | 0.14208000  |
| C | 7.78141300  | -0.71528500 | -0.72616500 |
| H | 7.22793600  | -0.89255700 | -1.65023400 |
| H | 8.68348800  | -0.17253500 | -1.01637000 |
| C | 8.15882800  | -2.02993000 | -0.05000300 |
| H | 8.74535600  | -1.84266500 | 0.85296100  |
| H | 7.27029800  | -2.59888800 | 0.23330800  |
| H | 8.75878600  | -2.64266000 | -0.72670700 |
| C | 7.78865200  | 1.13087300  | 0.92120100  |
| H | 7.33757400  | 1.25388600  | 1.90699100  |
| H | 8.76795900  | 0.67952800  | 1.09456200  |
| C | 7.95155800  | 2.47595600  | 0.22083700  |
| H | 6.98398400  | 2.95636500  | 0.05766700  |
| H | 8.56917200  | 3.14185800  | 0.82798300  |
| H | 8.43743500  | 2.34837300  | -0.74978200 |
| F | -0.28507300 | 1.59839300  | 2.17052700  |

**Coordinates for HCHI<sub>2</sub>HS<sup>-</sup> Reactant Complex**

|   |             |             |             |
|---|-------------|-------------|-------------|
| C | 1.17316500  | -0.91127700 | -0.00225800 |
| C | -0.25960700 | -0.85172300 | -0.00766000 |
| C | -0.96298500 | -2.13032600 | -0.00456800 |
| C | -0.98858200 | 0.31825300  | -0.00468200 |
| C | -3.05143600 | -0.93541100 | 0.00968900  |

|   |             |             |             |
|---|-------------|-------------|-------------|
| C | -2.38907100 | 0.30624700  | 0.00225600  |
| C | -3.19631300 | 1.46742400  | 0.00763700  |
| H | -2.70818500 | 2.43663500  | 0.00773100  |
| C | -5.22268100 | 0.11730100  | 0.03203800  |
| C | -4.42057100 | -1.04914400 | 0.02094700  |
| H | -0.48268700 | 1.28206000  | -0.00290500 |
| H | 1.56770400  | -1.91831600 | 0.03747900  |
| H | -4.84949400 | -2.03990300 | 0.00418400  |
| O | -2.33398400 | -2.09191000 | 0.00040900  |
| O | -0.45093000 | -3.22562500 | -0.00723900 |
| C | 2.02055300  | 0.15157700  | -0.04171200 |
| H | 1.60949100  | 1.15425800  | -0.09822400 |
| C | 3.43450400  | 0.02685100  | -0.01170600 |
| C | 4.26736100  | -1.25253900 | 0.09533800  |
| C | 4.07231100  | -2.16747600 | -1.12958900 |
| H | 4.23372900  | -1.61624700 | -2.05817600 |
| H | 4.80188200  | -2.97819500 | -1.08070200 |
| H | 3.07724600  | -2.61124300 | -1.15738500 |
| C | 3.99789200  | -1.99255900 | 1.42030800  |
| H | 2.99810900  | -2.42530200 | 1.45201300  |
| H | 4.72152800  | -2.80357800 | 1.52307600  |
| H | 4.11318500  | -1.31893300 | 2.27188700  |
| C | 5.66786400  | -0.68833300 | 0.09916700  |
| C | 5.60173300  | 0.69039100  | 0.00491700  |
| C | 6.89837300  | -1.31375600 | 0.18185100  |
| C | 6.72151100  | 1.50350100  | -0.01156400 |
| C | 8.04621400  | -0.52167800 | 0.16773600  |
| H | 6.97599200  | -2.39238400 | 0.25891600  |
| C | 7.95702400  | 0.86601400  | 0.07230700  |
| H | 6.65275400  | 2.58135400  | -0.08410600 |
| H | 9.02051200  | -0.99103300 | 0.23382900  |
| H | 8.86190000  | 1.46183800  | 0.06381800  |
| N | 4.24034900  | 1.07629500  | -0.06292500 |
| C | 3.88258700  | 2.48595600  | -0.15724000 |
| H | 2.81089200  | 2.61924300  | -0.28367000 |
| H | 4.39627300  | 2.91770900  | -1.01675900 |
| C | -4.55816100 | 1.38647500  | 0.02164700  |
| H | -5.13134900 | 2.30156700  | 0.04487200  |
| N | -6.57117300 | 0.03734000  | 0.05617500  |
| C | -7.26521100 | -1.24341200 | 0.17135700  |
| H | -6.70634300 | -1.89972300 | 0.84081100  |
| H | -8.21811200 | -1.04833500 | 0.66727600  |
| C | -7.50603800 | -1.91054100 | -1.17928400 |
| H | -8.11413300 | -1.26915700 | -1.82205700 |

|   |             |             |             |
|---|-------------|-------------|-------------|
| H | -6.56372700 | -2.11423200 | -1.69314600 |
| H | -8.03383000 | -2.85690700 | -1.04120800 |
| C | -7.42661500 | 1.22077300  | -0.01969400 |
| H | -6.99159000 | 1.94453900  | -0.71075600 |
| H | -8.36746800 | 0.90304100  | -0.47349600 |
| C | -7.69026700 | 1.85074800  | 1.34402700  |
| H | -6.76314100 | 2.19928100  | 1.80489900  |
| H | -8.36455000 | 2.70380700  | 1.23915300  |
| H | -8.15572200 | 1.12772600  | 2.01858500  |
| H | 4.20596300  | 2.99276300  | 0.75319800  |
| S | 0.24946600  | 3.70303200  | -0.49479000 |
| H | 1.18547600  | 4.61396700  | -0.16820400 |

**Coordinates for HCHI\_CN<sup>-</sup> Reactant Complex**

|   |             |             |             |
|---|-------------|-------------|-------------|
| C | 1.17379400  | -0.79848300 | 0.01975300  |
| C | -0.26253600 | -0.72399300 | 0.00622300  |
| C | -0.97835800 | -1.99125200 | 0.09666300  |
| C | -0.97086100 | 0.45631500  | -0.07735200 |
| C | -3.05239200 | -0.77669400 | 0.02748400  |
| C | -2.37671600 | 0.45239400  | -0.06764100 |
| C | -3.17543600 | 1.61578100  | -0.13829300 |
| H | -2.68301500 | 2.57956500  | -0.20585600 |
| C | -5.21580100 | 0.29273500  | -0.01636600 |
| C | -4.42420300 | -0.87724200 | 0.04878300  |
| H | -0.44222200 | 1.41644100  | -0.15321100 |
| H | 1.56482500  | -1.80433700 | 0.10884900  |
| H | -4.86077700 | -1.86358300 | 0.10134500  |
| O | -2.34886400 | -1.94000000 | 0.09703000  |
| O | -0.47875100 | -3.09108900 | 0.17096700  |
| C | 2.00925100  | 0.26973800  | -0.06434700 |
| H | 1.57921400  | 1.26823200  | -0.15803800 |
| C | 3.42408100  | 0.16743700  | -0.03443600 |
| C | 4.28763400  | -1.08669800 | 0.10281800  |
| C | 4.09636700  | -2.04502500 | -1.08836400 |
| H | 4.23731200  | -1.52212900 | -2.03655400 |
| H | 4.84002000  | -2.84174700 | -1.02186700 |
| H | 3.10747200  | -2.50347200 | -1.08800600 |
| C | 4.04650200  | -1.79041600 | 1.45264700  |
| H | 3.05487200  | -2.23984800 | 1.50606800  |
| H | 4.78630600  | -2.58426800 | 1.57392800  |
| H | 4.15582200  | -1.08830400 | 2.28173900  |
| C | 5.67425400  | -0.49008600 | 0.07265300  |
| C | 5.57298900  | 0.88411200  | -0.06062800 |

|   |             |             |             |
|---|-------------|-------------|-------------|
| C | 6.92006000  | -1.08353200 | 0.15948000  |
| C | 6.67354700  | 1.72172500  | -0.11512400 |
| C | 8.04881900  | -0.26548600 | 0.10881900  |
| H | 7.02343200  | -2.15740100 | 0.26736300  |
| C | 7.92516500  | 1.11605900  | -0.02711500 |
| H | 6.57753000  | 2.79483600  | -0.22054700 |
| H | 9.03462800  | -0.70991600 | 0.17733600  |
| H | 8.81537500  | 1.73263700  | -0.06429500 |
| N | 4.20276200  | 1.23566200  | -0.12136800 |
| C | 3.80116400  | 2.63267600  | -0.25380200 |
| H | 2.71423700  | 2.73993700  | -0.29091500 |
| H | 4.24068200  | 3.03170400  | -1.16953300 |
| C | -4.53958300 | 1.55010200  | -0.11312400 |
| H | -5.10349400 | 2.47067400  | -0.14812200 |
| N | -6.56741500 | 0.22750000  | 0.01523900  |
| C | -7.27335400 | -1.03510100 | 0.21557800  |
| H | -6.71613400 | -1.65514300 | 0.92004200  |
| H | -8.22028000 | -0.79994200 | 0.70624900  |
| C | -7.53245000 | -1.78310400 | -1.08868800 |
| H | -8.13854900 | -1.17579400 | -1.76557900 |
| H | -6.59606600 | -2.02803900 | -1.59541500 |
| H | -8.06929300 | -2.71337500 | -0.88917700 |
| C | -7.41093900 | 1.40940800  | -0.14923200 |
| H | -6.96266400 | 2.08166200  | -0.88265300 |
| H | -8.35064700 | 1.07044500  | -0.59049500 |
| C | -7.68301800 | 2.13376900  | 1.16518200  |
| H | -6.75672900 | 2.50132700  | 1.61294400  |
| H | -8.34482000 | 2.98606400  | 0.99434800  |
| H | -8.16586700 | 1.46363500  | 1.88089900  |
| H | 4.19463300  | 3.18477000  | 0.60154500  |
| C | 0.67886700  | 2.96012400  | -0.32698700 |
| N | 1.82546700  | 2.96012400  | -0.32698700 |

**Coordinates for HCHI\_F- Reactant Complex**

|   |             |             |             |
|---|-------------|-------------|-------------|
| C | -0.62859300 | -1.39771900 | -0.19981800 |
| C | 0.79682600  | -1.21943800 | -0.18795000 |
| C | 1.58266900  | -2.18038900 | -0.95268800 |
| C | 1.43491000  | -0.20342200 | 0.49406900  |
| C | 3.57543300  | -0.99197000 | -0.31860800 |
| C | 2.83218300  | -0.07299000 | 0.44356500  |
| C | 3.55770800  | 0.94084500  | 1.10886800  |
| H | 3.00935500  | 1.66818300  | 1.69724900  |
| C | 5.66307200  | 0.08497000  | 0.23616100  |

|   |             |             |             |
|---|-------------|-------------|-------------|
| C | 4.94497900  | -0.93404500 | -0.43234600 |
| H | 0.85689500  | 0.50974400  | 1.09853800  |
| H | -0.96658400 | -2.28041000 | -0.72914100 |
| H | 5.43914700  | -1.69392500 | -1.01969100 |
| O | 2.94319700  | -2.00297400 | -0.97550300 |
| O | 1.15014200  | -3.12317800 | -1.57586800 |
| C | -1.51863400 | -0.53938100 | 0.36557800  |
| H | -1.14239200 | 0.34107100  | 0.88572300  |
| C | -2.92299100 | -0.72513600 | 0.35301700  |
| C | -3.73497600 | -1.92361500 | -0.12488400 |
| C | -3.36587400 | -3.20962300 | 0.63318600  |
| H | -3.46220800 | -3.06651200 | 1.71127600  |
| H | -4.04456500 | -4.00906700 | 0.32899900  |
| H | -2.34577700 | -3.52637600 | 0.41373100  |
| C | -3.60649500 | -2.09684400 | -1.65364400 |
| H | -2.60941000 | -2.42815800 | -1.94314200 |
| H | -4.32434000 | -2.85052000 | -1.98314700 |
| H | -3.82718500 | -1.16061600 | -2.17085900 |
| C | -5.13736800 | -1.47624000 | 0.21326700  |
| C | -5.09272200 | -0.19894000 | 0.74970500  |
| C | -6.35307400 | -2.11404300 | 0.04867700  |
| C | -6.22827100 | 0.49203900  | 1.13673500  |
| C | -7.51303300 | -1.44333600 | 0.43476300  |
| H | -6.40865200 | -3.11157700 | -0.37255300 |
| C | -7.44843900 | -0.15835200 | 0.96969200  |
| H | -6.18915400 | 1.49161300  | 1.55029900  |
| H | -8.47602500 | -1.92533100 | 0.31558000  |
| H | -8.36070700 | 0.34808700  | 1.26139300  |
| N | -3.73852200 | 0.21434600  | 0.81175800  |
| C | -3.32754700 | 1.56952800  | 1.20848900  |
| H | -2.42417300 | 1.50701800  | 1.82140300  |
| H | -4.12640100 | 1.97743900  | 1.82641300  |
| C | 4.91709700  | 1.02673000  | 1.01461500  |
| H | 5.42284700  | 1.83403600  | 1.52367700  |
| N | 7.00996000  | 0.17031800  | 0.14208000  |
| C | 7.78141300  | -0.71528500 | -0.72616500 |
| H | 7.22793600  | -0.89255700 | -1.65023400 |
| H | 8.68348800  | -0.17253500 | -1.01637000 |
| C | 8.15882800  | -2.02993000 | -0.05000300 |
| H | 8.74535600  | -1.84266500 | 0.85296100  |
| H | 7.27029800  | -2.59888800 | 0.23330800  |
| H | 8.75878600  | -2.64266000 | -0.72670700 |
| C | 7.78865200  | 1.13087300  | 0.92120100  |
| H | 7.33757400  | 1.25388600  | 1.90699100  |

|   |             |            |             |
|---|-------------|------------|-------------|
| H | 8.76795900  | 0.67952800 | 1.09456200  |
| C | 7.95155800  | 2.47595600 | 0.22083700  |
| H | 6.98398400  | 2.95636500 | 0.05766700  |
| H | 8.56917200  | 3.14185800 | 0.82798300  |
| H | 8.43743500  | 2.34837300 | -0.74978200 |
| F | -0.28507300 | 1.59839300 | 2.17052700  |
| H | -3.06687400 | 2.43492300 | -0.00710200 |
